# Supplementary material for: Helminth Infections in Cattle and Goats in Kanchanaburi, Thailand, with Focus on Strongyle Nematode Infections
Source: MDPI journal article supplement (doi:10.3390/vetsci8120324), 2021-12-12
Supplement: s1 [file s1]

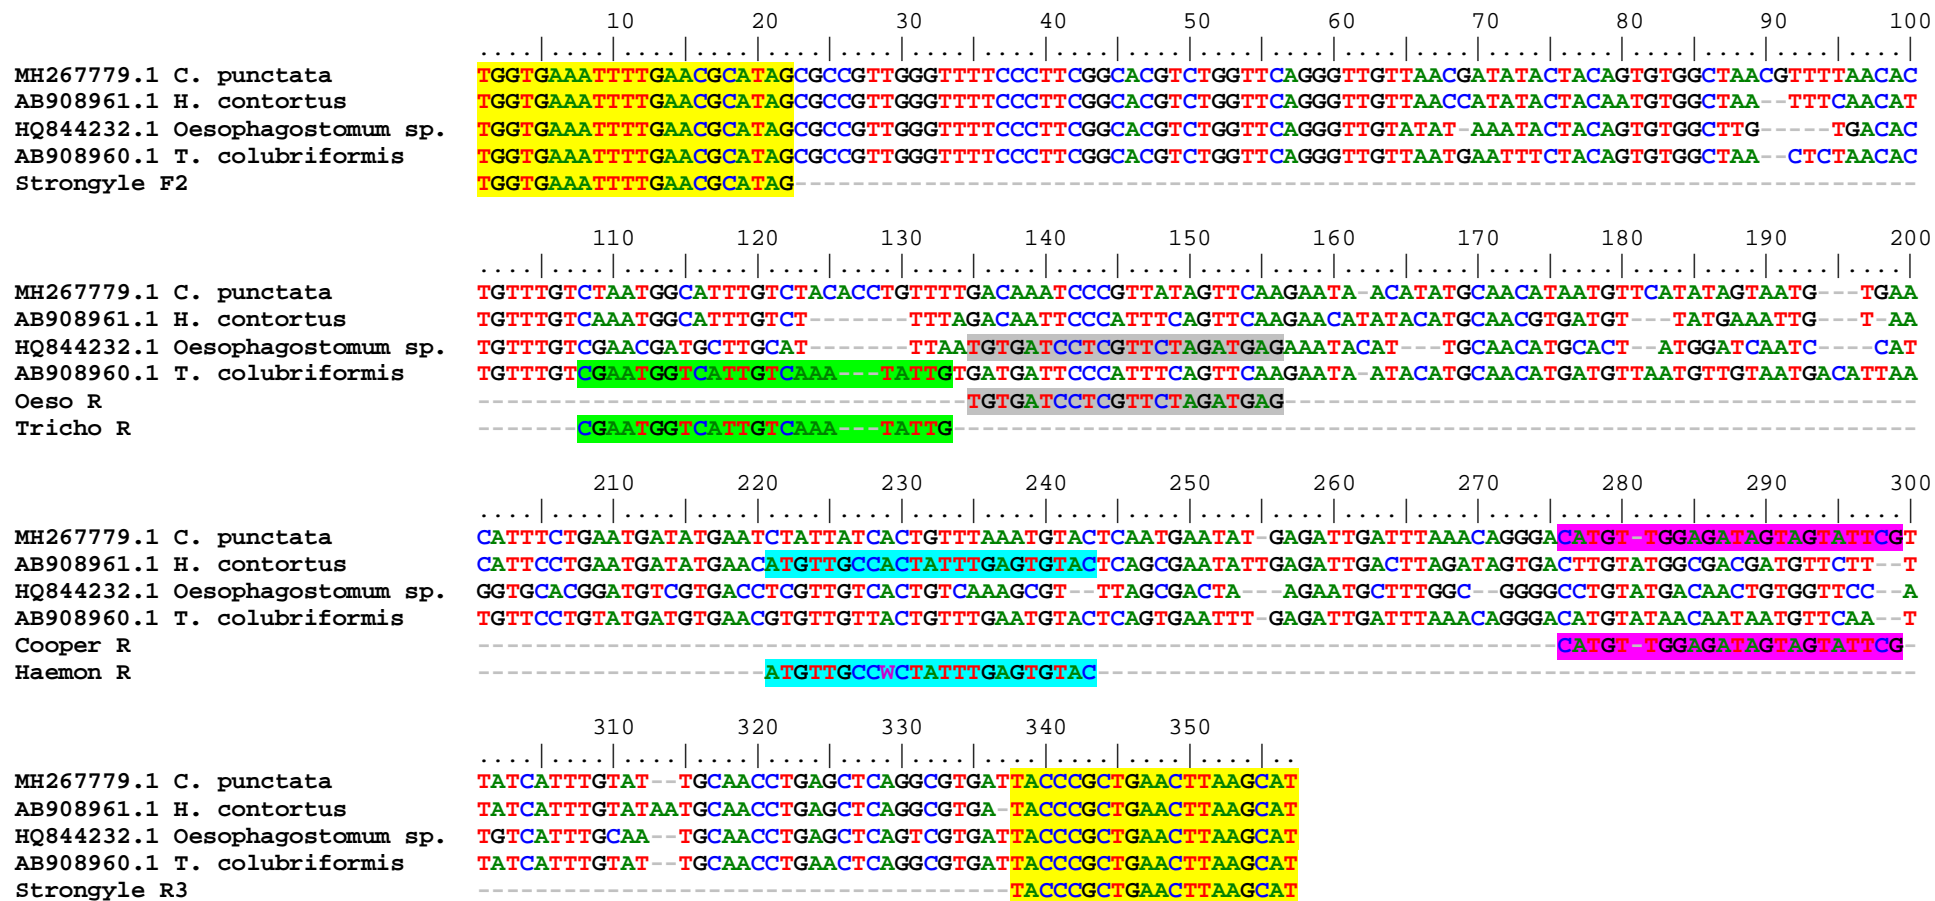

Product sizes  
F2/R3 C-349 bp, H-338 bp, O-324 bp, T-346 bp  
F2/Cooper R-293 bp  
F2/Haemon R 227 bp  
F2/Oeso R 143 bp  
F2/Tricho R 128 bp

**Figure S1** Alignments of strongyle genus-specific primers with sequences of *Cooperia* spp. (C), *Haemonchus* spp. (H), *Oesophagostomum* spp. (O), and *Trichostrongylus* spp. (T).

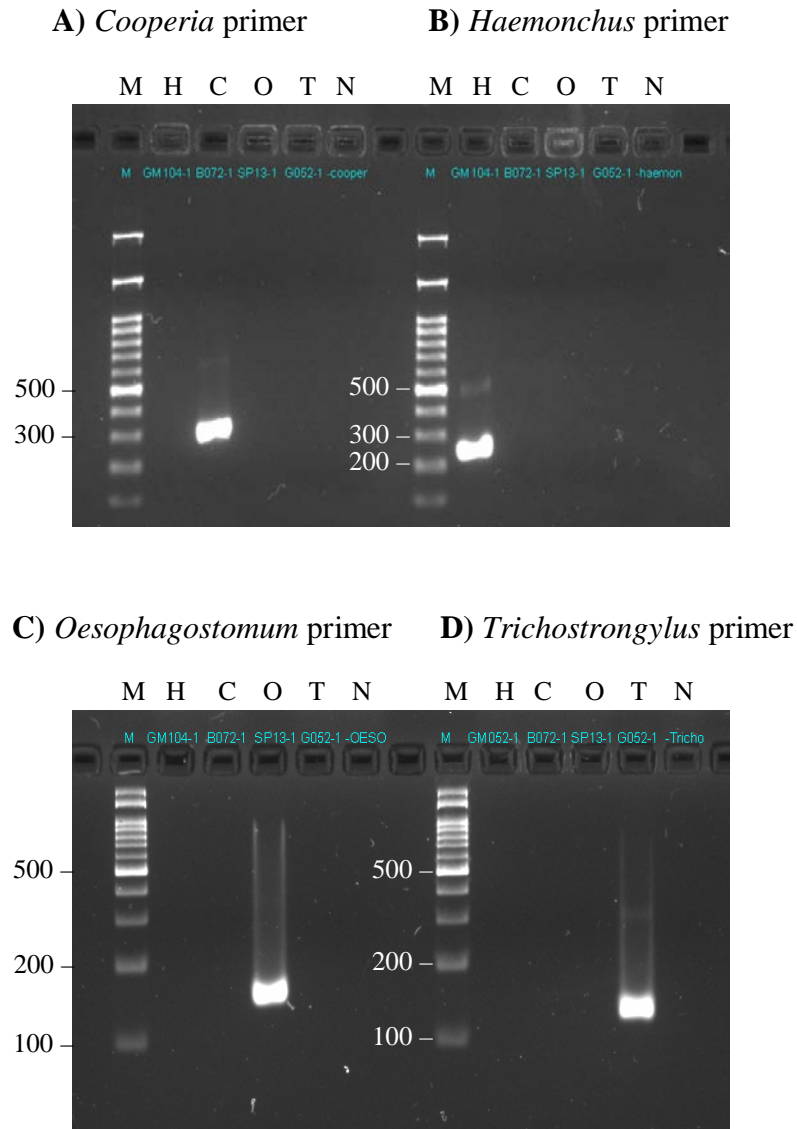

**Figure S2** Specific amplification of ITS-2 gene fragments with strongyle genus-specific primers. ITS-2 DNA fragments of 4 strongyles were amplified using primers Strongyle F2/R3 and cloned into pGEM-T Easy plasmid. The DNA fragments in the plasmid were subjected to DNA sequencing and BLAST analysis to confirm the strongyle genus [*Haemonchus* spp. (H), *Cooperia* spp. (C), *Oesophagostomum* spp. (O), and *Trichostrongylus* spp. (T)]. The plasmids were used in PCR reaction with a specific primer for each strongyle. Gel electrophoresis showed specific amplifications of the strongyle ITS-2 using specific primers for *Cooperia* spp. (Figure S2 A), *Haemonchus* spp. (Figure S2 B), *Oesophagostomum* spp. (Figure S2 C), and *Trichostrongylus* spp. (Figure S2 D) with PCR product sizes approximately 290, 230, 140 and 130 bp, respectively. M; 100 bp marker, N; negative control.
